# Supplementary material
Source: Royal Society of Chemistry journal article supplement (doi:10.1039/d6qi00802j)
Supplement: d6qi00802j1.pdf [file d6qi00802j1.pdf]

# **Phase-evolved BiOCl/Bi<sub>3</sub>O<sub>4</sub>Cl S-scheme Heterojunction for Enhanced Photocatalytic Nitrogen Fixation**

Xitong Wang<sup>+a</sup>, Xiao Yu<sup>+a</sup>, Liping Feng<sup>\*a</sup>, Yuan Tian<sup>a</sup>, Yan Li<sup>a</sup>, Yulong Yang<sup>a</sup>

<sup>a</sup> State Key Lab of Solidification Processing, College of Materials Science and Engineering, Northwestern Polytechnical University, Xi'an, Shaanxi, 710072, People's Republic of China.

E-mail addresses: lpfeng@nwpu.edu.cn

† These authors contributed equally to this work.

## **Table of Contents**

|                                      |                   |
|--------------------------------------|-------------------|
| <b>Methods</b>                       | <b>Page 2-3</b>   |
| <b>Supplementary Figures 1-32</b>    | <b>Page 3-14</b>  |
| <b>Supplementary Tables 1-6</b>      | <b>Page 15-17</b> |
| <b>Supplementary References 1-57</b> | <b>Page 18</b>    |

## Methods

Theoretical calculations: The computation was performed using the VASP software based on first-principles calculation. The projected augmented wave (PAW) pseudopotential was used, and the exchange - correlation energy was treated with the PBE functional within the GGA. During geometry optimization, the cutoff energy was 500 eV, and self - consistency was achieved when the total energy converged to  $10^{-5}$  eV/atom. The vacuum layer thickness was set to exceed 15 Å. For molecular dynamics simulations of BiOCl and Bi<sub>3</sub>O<sub>4</sub>Cl at 450 K, VASP was also employed. The simulation lasted 2000 fs with a 1 fs time step to evaluate thermal stability.

Photocatalytic N<sub>2</sub> fixation: Photocatalytic nitrogen fixation experiments were carried out in a sealed quartz reactor using a 300 W xenon lamp as the light source. First, the reactor was purged with high-purity nitrogen gas under dark conditions with continuous stirring for 30 minutes to fully saturate the reaction system with N<sub>2</sub>. Subsequently, the photocatalytic reaction was conducted under light irradiation for 5 hours. After the reaction, 2 mL of the reaction solution was withdrawn and centrifuged to remove insoluble impurities, and the concentration of the produced ammonia was determined via the indophenol blue spectrophotometric method.

Product Detection: NH<sub>3</sub> concentration was determined by the indophenol blue method. To 2 mL of the reaction solution, 2 mL of a solution containing 5% salicylic acid, 5% sodium citrate and 1 M NaOH, 1 mL of 0.05 M NaClO, and 50 µL of 1% sodium nitroferricyanide dihydrate were added. After 2 hours of color development, the absorbance at 665 nm was measured by UV-Vis spectrophotometry to calculate the NH<sub>3</sub> yield. NO<sub>3</sub><sup>-</sup> was determined by UV-Vis spectrophotometry. To 5 mL of the reaction solution, 100 µL of 0.1 M HCl and 10 µL of 0.8 wt.% ammonium sulfamate were added. After 30 min of dark incubation, the absorbance was measured to

calculate the  $\text{NO}_3^-$  concentration via  $A_{220}-2A_{275}$  and a calibration curve.  $\text{NO}_2^-$  was quantified by UV-Vis spectrophotometry. To 5 mL of the reaction solution, 0.1 mL of Griess reagent (8% p-aminobenzenesulfonamide, 0.4% N-(1-naphthyl)ethylenediamine dihydrochloride) was added. After 20 min of color development, the absorbance at 540 nm was recorded to determine the  $\text{NO}_2^-$  concentration.

## Supporting pictures

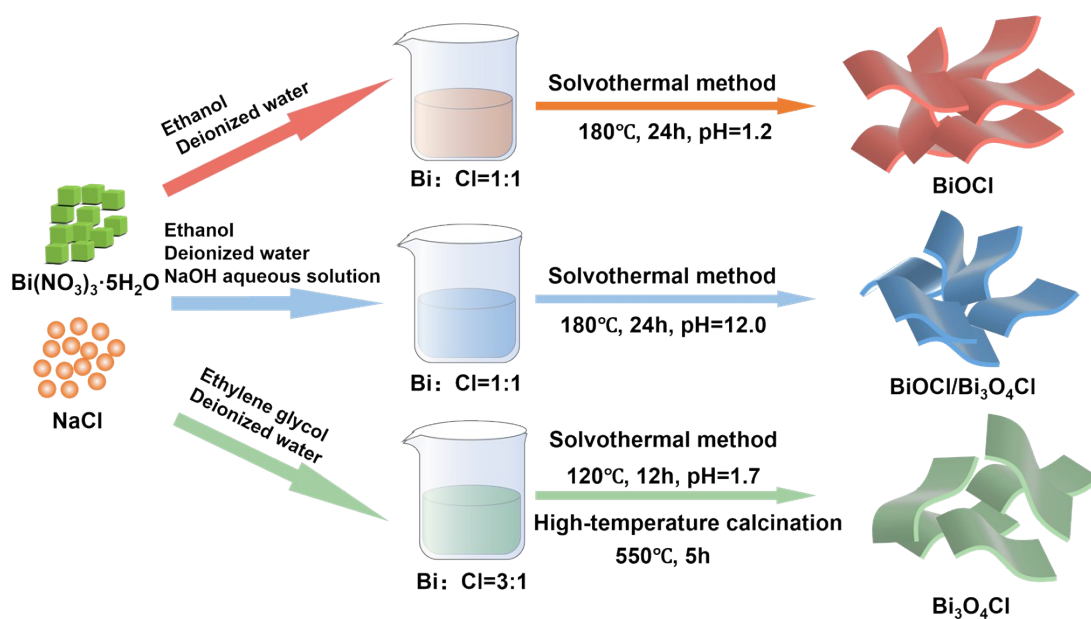

**Figure S1.** Schematic representation of the fabrication process of  $\text{BiOCl}$ ,  $\text{BiOCl}/\text{Bi}_3\text{O}_4\text{Cl}$  and  $\text{Bi}_3\text{O}_4\text{Cl}$

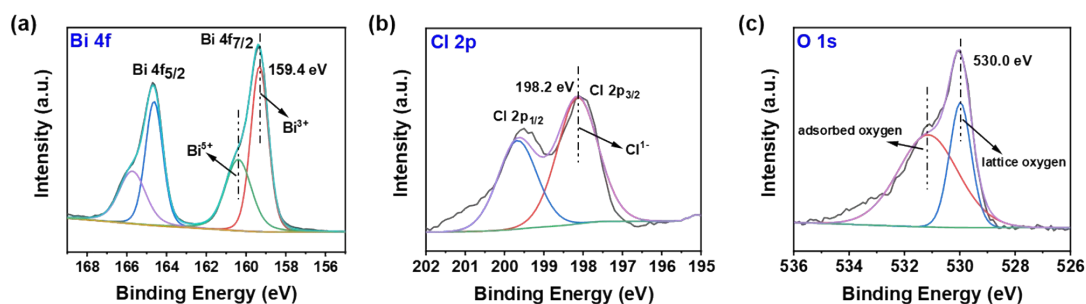

**Figure S2.** Bi 4f spectrum (a), Cl 2p spectrum (b) and O 1s spectrum (c) of  $\text{BiOCl}$ .

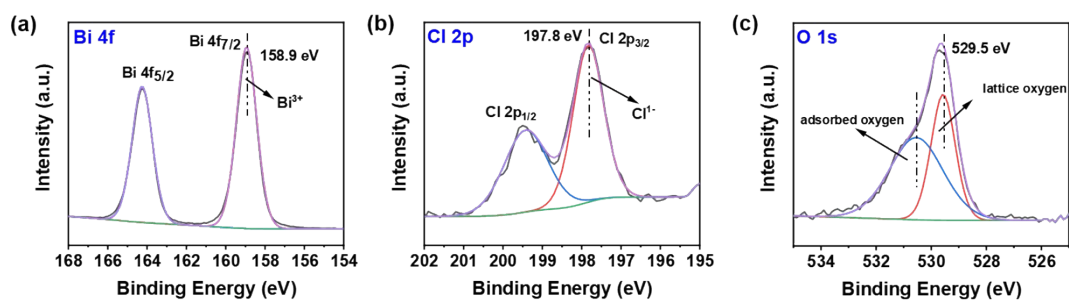

**Figure S3.** Bi 4f spectrum (a), Cl 2p spectrum (b) and O 1s spectrum (c) of  $\text{Bi}_3\text{O}_4\text{Cl}$ .

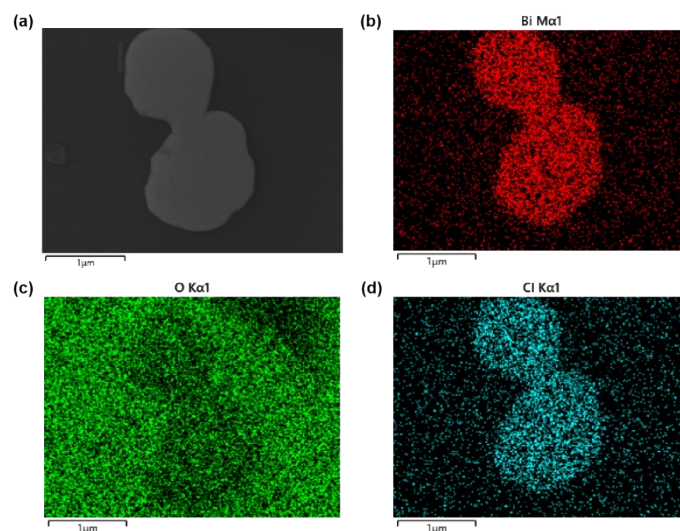

**Figure S4.** SEM image (a), and elemental distribution mappings Bi (b), O (c) and Cl (d) of BiOCl.

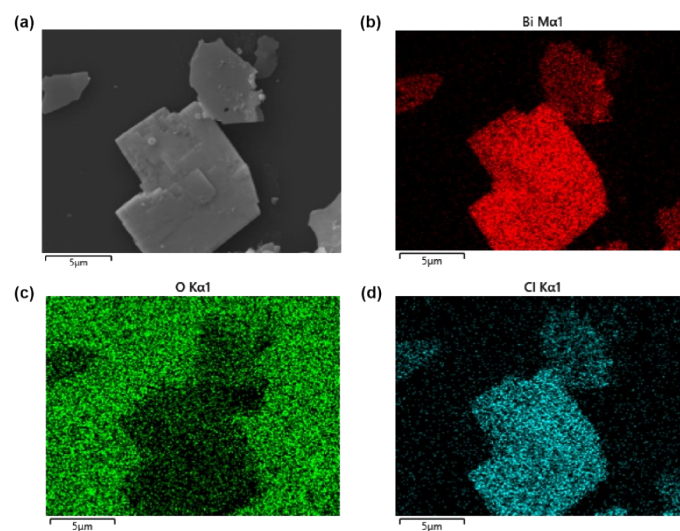

**Figure S5.** SEM image (a), and elemental distribution mappings Bi (b), O (c) and Cl (d) of BiOCl/Bi<sub>3</sub>O<sub>4</sub>Cl.

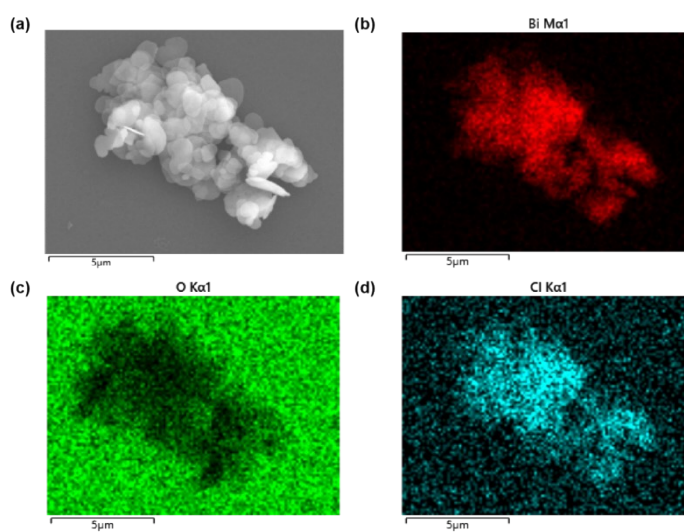

**Figure S6.** SEM image (a), and elemental distribution mappings Bi (b), O (c) and Cl (d) of BiOCl/Bi<sub>3</sub>O<sub>4</sub>Cl.

$\text{Bi}_3\text{O}_4\text{Cl}$ .

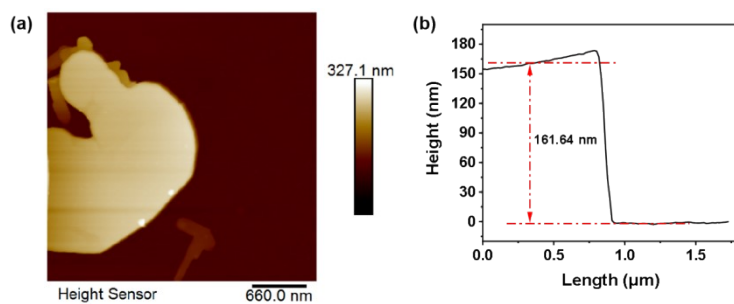

**Figure S7.** AFM images (a) and the corresponding height profile measured (b) of BiOCl.

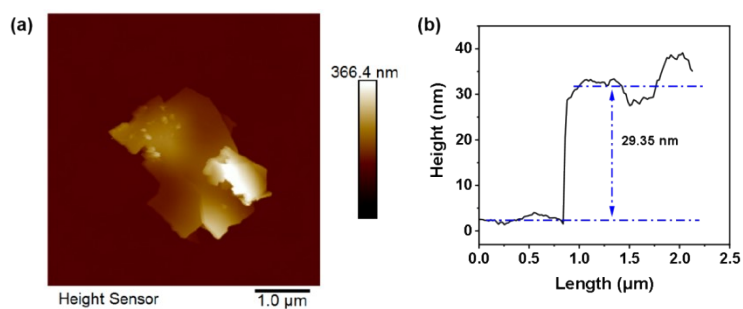

**Figure S8.** AFM images (a) and the corresponding height profile measured (b) of BiOCl/Bi<sub>3</sub>O<sub>4</sub>Cl.

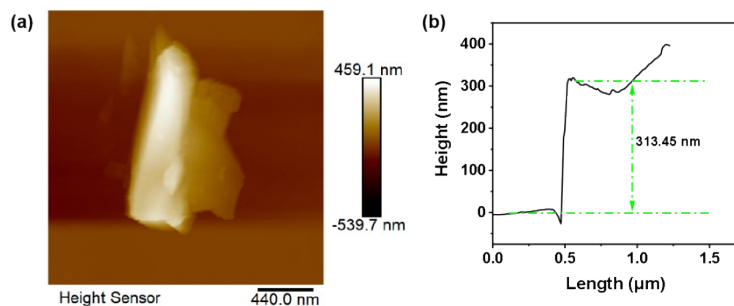

**Figure S9.** AFM images (a) and the corresponding height profile measured (b) of Bi<sub>3</sub>O<sub>4</sub>Cl.

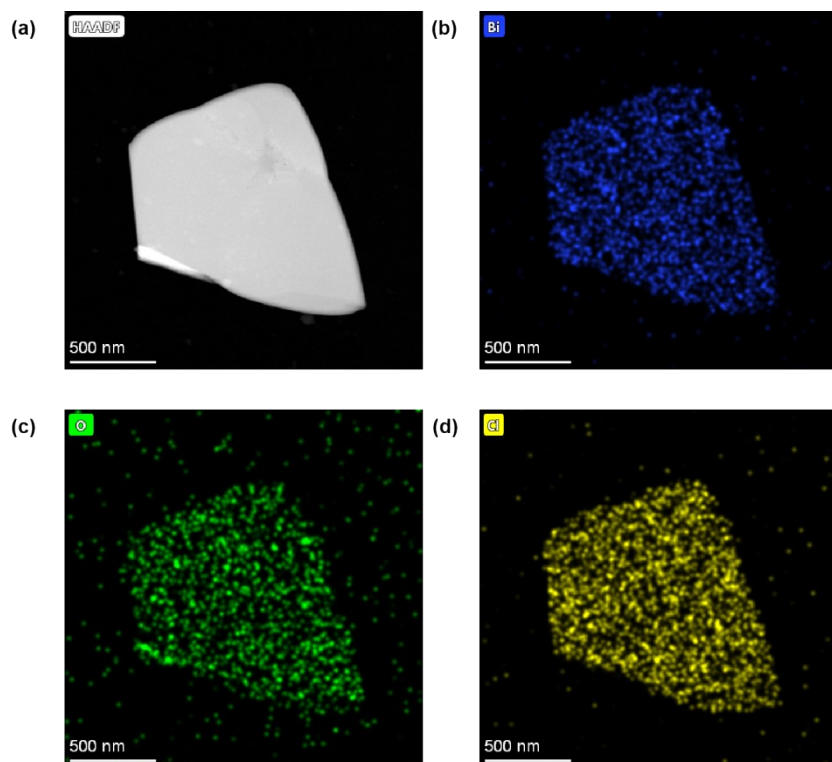

**Figure S10.** TEM (a), elemental distribution mappings Bi (b), O (c) and Cl (d) of BiOCl.

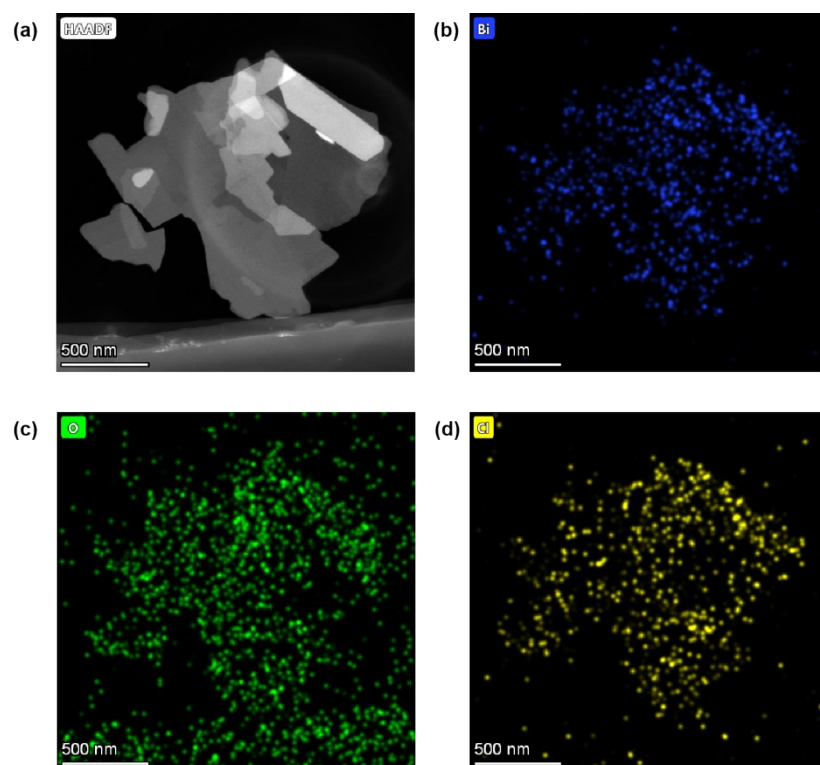

**Figure S11.** TEM (a), elemental distribution mappings Bi (b), O (c) and Cl (d) of Bi<sub>3</sub>O<sub>4</sub>Cl.

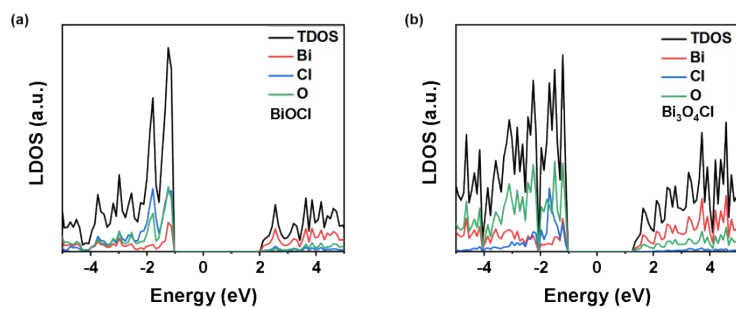

**Figure S12.** LDOS of BiOCl (a) and Bi<sub>3</sub>O<sub>4</sub>Cl (b).

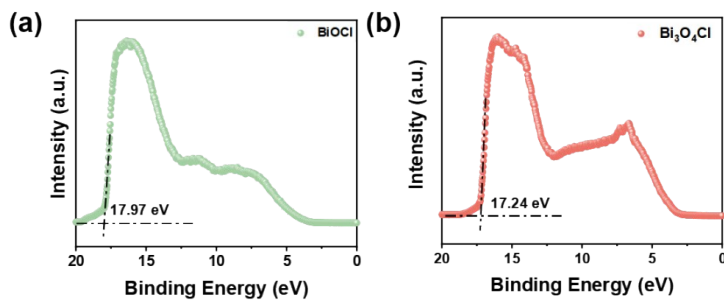

**Figure S13.** UPS spectra of BiOCl (a) and Bi<sub>3</sub>O<sub>4</sub>Cl (b).

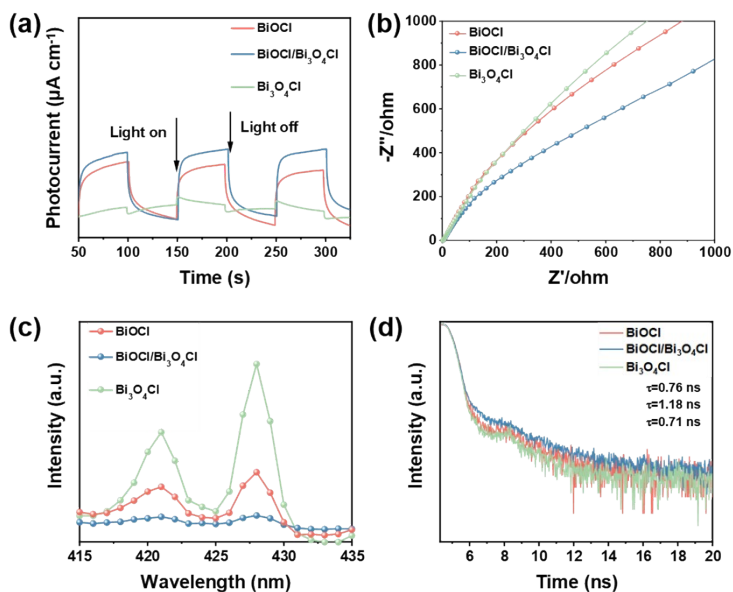

**Figure S14.** Transient photocurrent response (a), EIS spectrum (b), PL spectrum (c) and TRPL decay spectrum (d) of BiOCl, BiOCl/Bi<sub>3</sub>O<sub>4</sub>Cl and Bi<sub>3</sub>O<sub>4</sub>Cl.

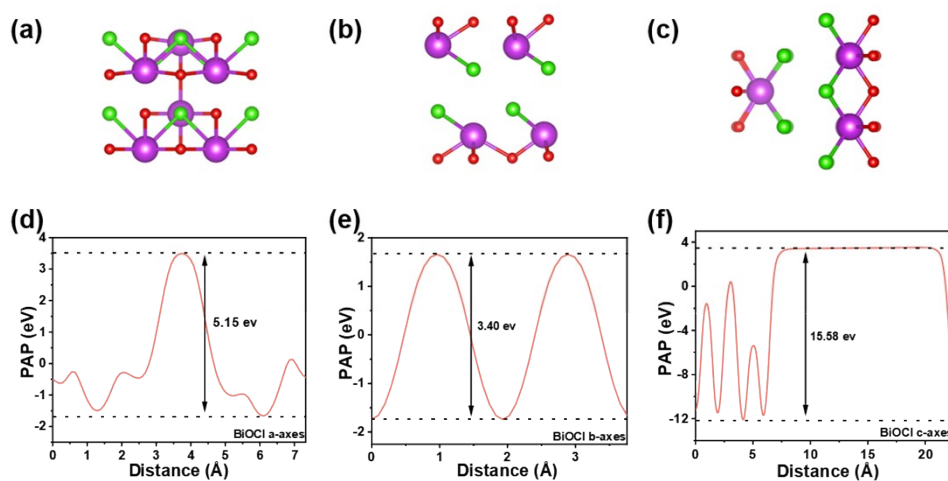

**Figure S15.** Schematic diagrams of BiOCl along the a-axis, b-axis, and c-axis (a-c), and planar electrostatic potentials along the three respective directions (d-f)

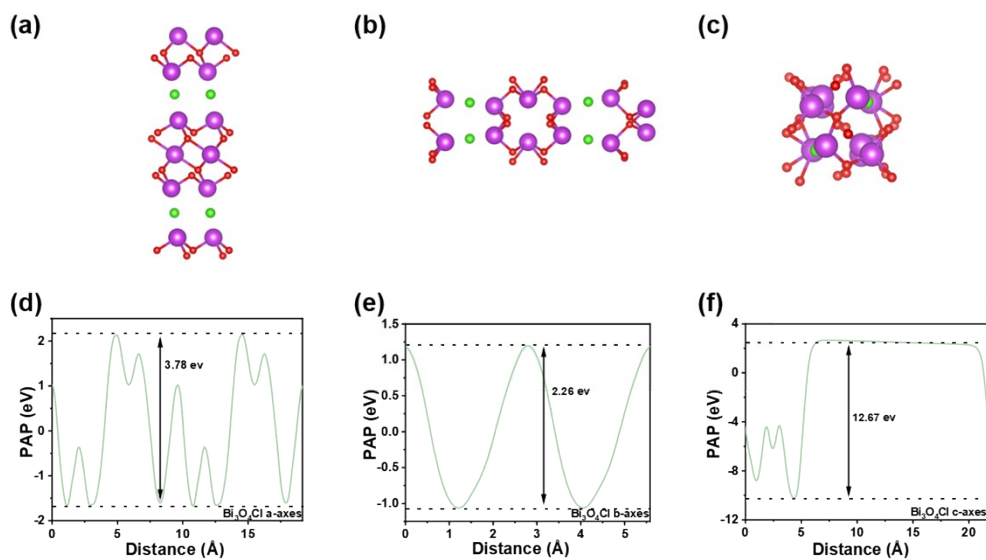

**Figure S16.** Schematic diagrams of Bi<sub>3</sub>O<sub>4</sub>Cl along the a-axis, b-axis, and c-axis (a-c), and planar electrostatic potentials along the three respective directions (d-f)

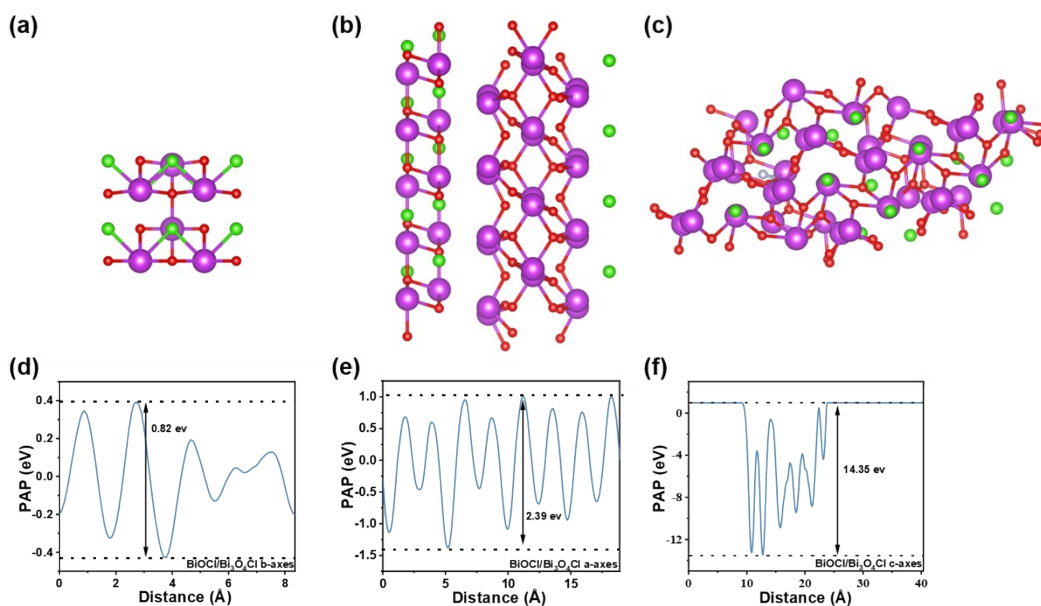

**Figure S17.** Schematic diagrams of BiOCl/Bi<sub>3</sub>O<sub>4</sub>Cl along the a-axis, b-axis, and c-axis (a-c), and planar electrostatic potentials along the three respective directions (d-f)

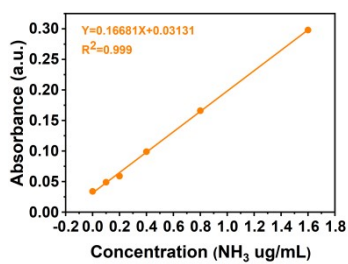

**Figure S18.** Standard curve for detecting ammonia with indophenol blue.

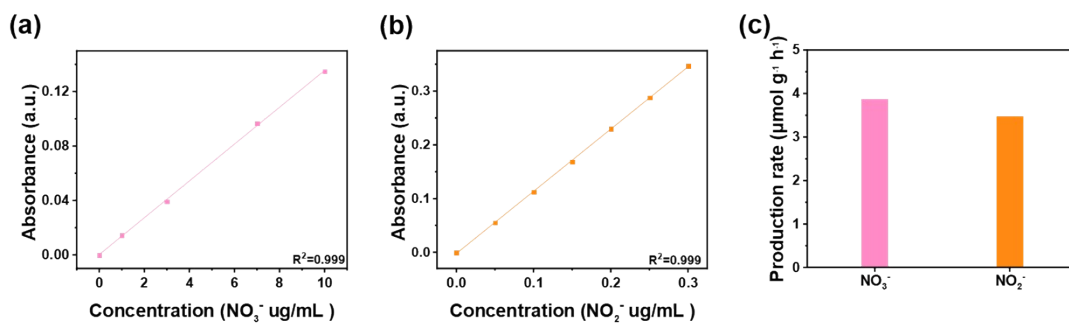

**Figure S19.** Standard curves of NO<sub>3</sub><sup>-</sup> (a) and NO<sub>2</sub><sup>-</sup> (b), and production rates of NO<sub>3</sub><sup>-</sup> and NO<sub>2</sub><sup>-</sup> of BiOCl/Bi<sub>3</sub>O<sub>4</sub>Cl (c).

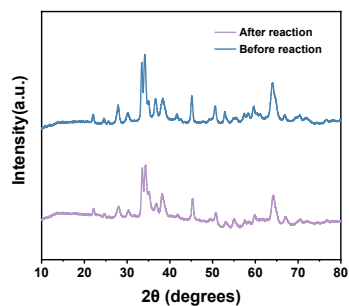

**Figure S20.** XRD patterns of BiOCl/Bi<sub>3</sub>O<sub>4</sub>Cl before and after the photocatalytic nitrogen fixation test

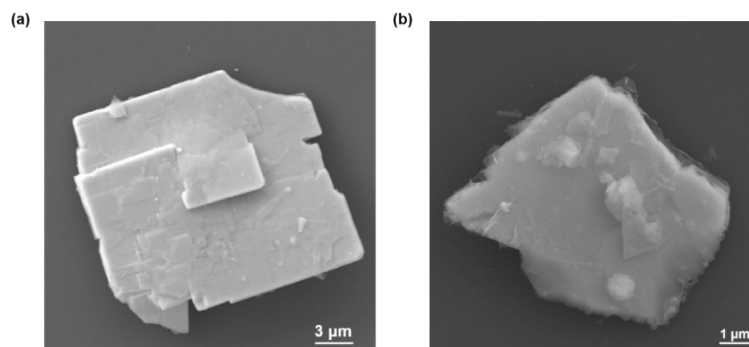

**Figure S21.** SEM image of BiOCl/Bi<sub>3</sub>O<sub>4</sub>Cl before (a) and after (b) the photocatalytic nitrogen fixation test.

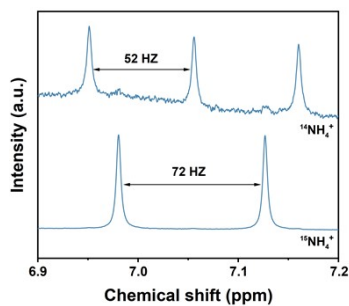

**Figure S22.** <sup>1</sup>H NMR spectrum of the product solution after the photocatalytic nitrogen fixation reaction

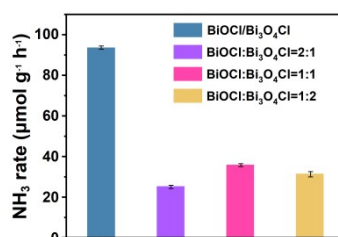

**Figure S23.** The NH<sub>3</sub> generation rate under simulated sunlight of BiOCl/Bi<sub>3</sub>O<sub>4</sub>Cl and direct mixing of BiOCl and Bi<sub>3</sub>O<sub>4</sub>Cl in different proportions

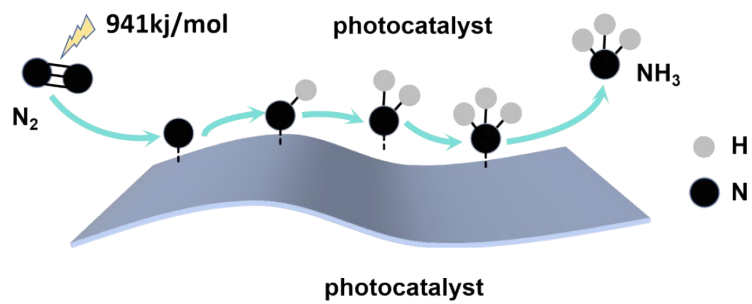

**Figure S24.** Schematic diagram of the direct dissociation pathway for nitrogen reduction to ammonia.

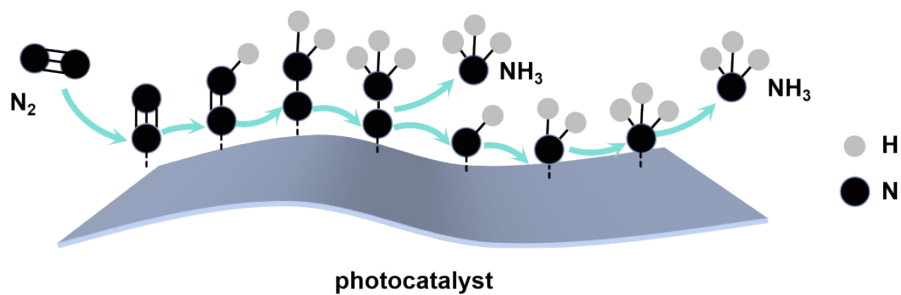

**Figure S25.** Schematic diagram of the of the distal dissociation pathway for nitrogen reduction to ammonia.

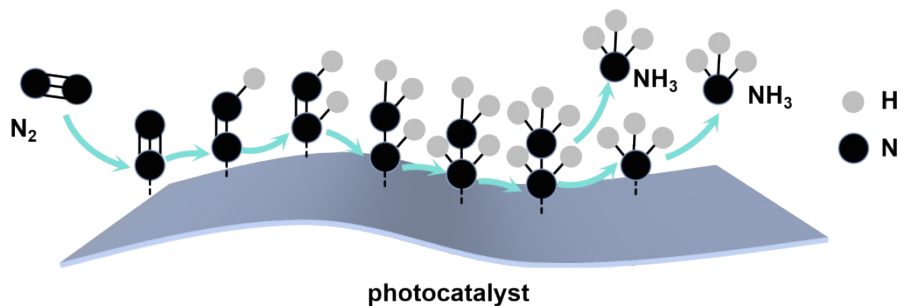

**Figure S26.** Schematic diagram of the of the the alternating dissociation pathway for nitrogen reduction to ammonia.

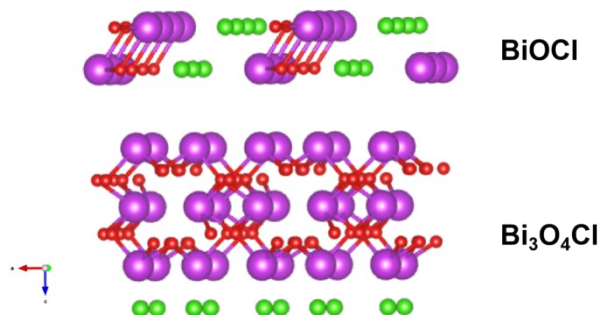

**Figure S27.** Schematic diagram of the BiOCl/Bi<sub>3</sub>O<sub>4</sub>Cl heterojunction.

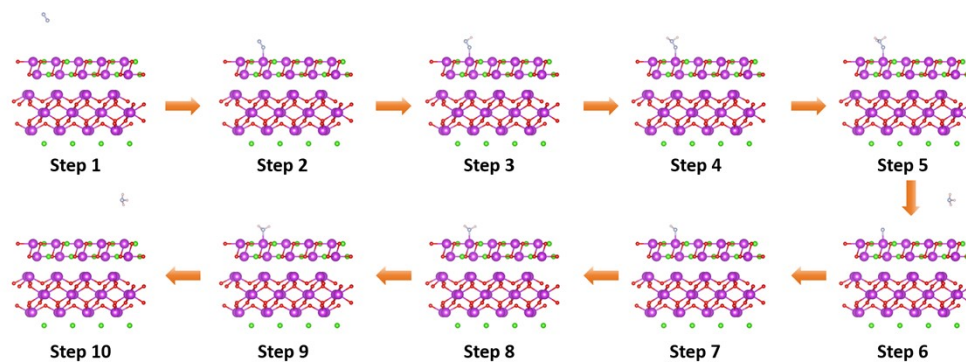

**Figure S28.** Schematic diagram of the nitrogen reduction structure for the distal pathway on  $\text{BiOCl}/\text{Bi}_3\text{O}_4\text{Cl}$ .

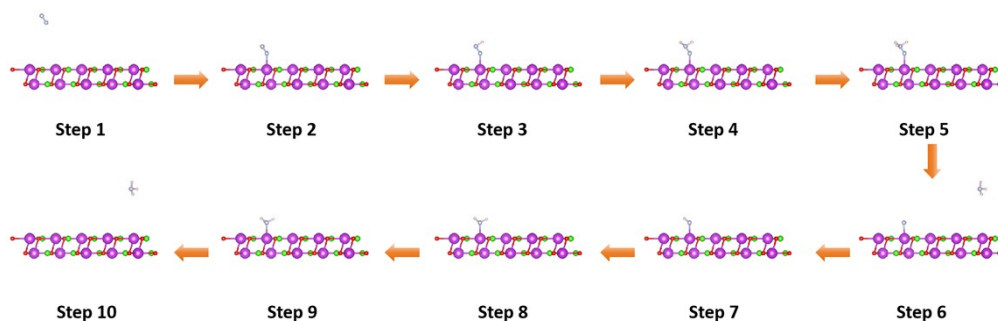

**Figure S29.** Schematic diagram of the nitrogen reduction structure for the distal pathway on  $\text{BiOCl}$ .

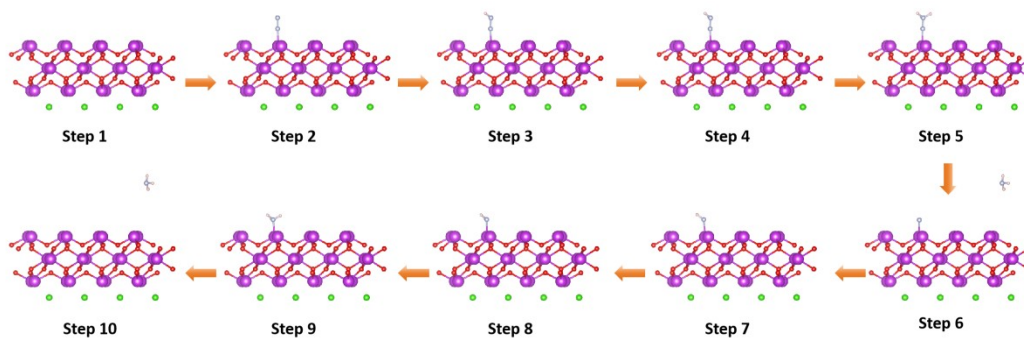

**Figure S30.** Schematic diagram of the nitrogen reduction structure for the distal pathway on  $\text{Bi}_3\text{O}_4\text{Cl}$ .

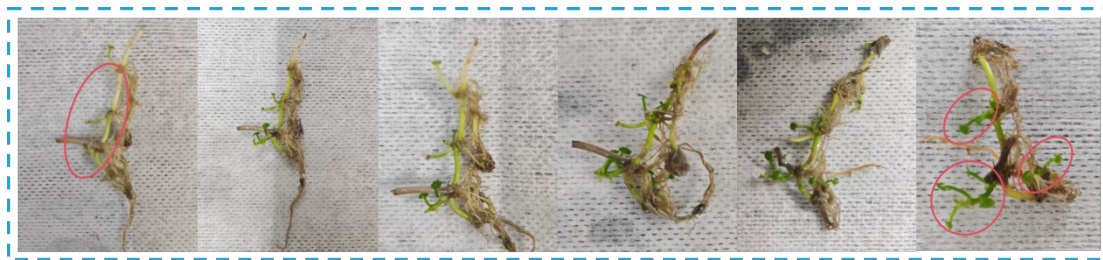

**Figure S31.** Non toxicity experiment of BiOCl/Bi<sub>3</sub>O<sub>4</sub>Cl heterojunction

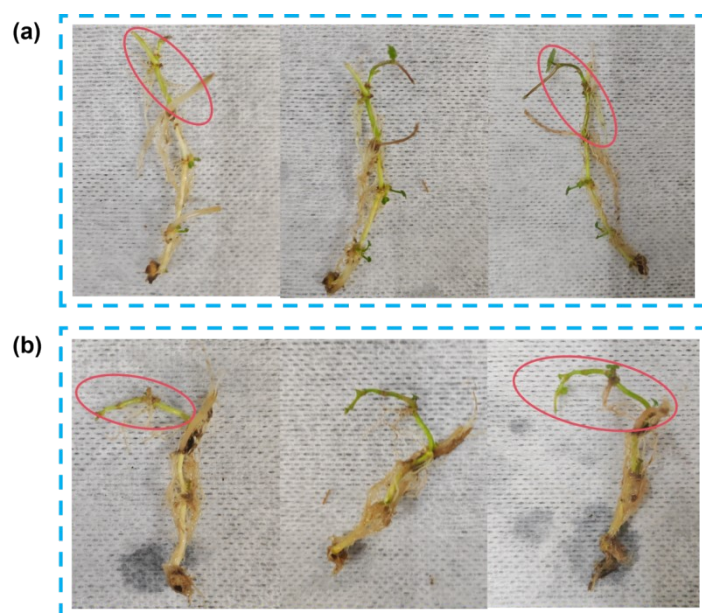

**Figure S32.** Growth experiment of pennywort in solution containing nitrogen reduction products (a); growth experiment of pennywort in water (b).

## Supporting Tables:

**Table S1** Content ratio of various elements in BiOCl.

| Element | Family | Atomic Feaction (%) | Atomic Error (%) |
|---------|--------|---------------------|------------------|
| O       | K      | 50.59               | 6.13             |
| Cl      | K      | 24.24               | 8.06             |
| Bi      | L      | 25.27               | 4.69             |

**Table S2** Content ratio of various elements in BiOCl/Bi<sub>3</sub>O<sub>4</sub>Cl.

| Element | Family | Atomic Feaction (%) | Atomic Error (%) |
|---------|--------|---------------------|------------------|
| O       | K      | 67.38               | 13.93            |
| Cl      | K      | 9.98                | 3.83             |
| Bi      | L      | 22.64               | 4.85             |

**Table S3** Content ratio of various elements in Bi<sub>3</sub>O<sub>4</sub>Cl.

| Element | Family | Atomic Feaction (%) | Atomic Error (%) |
|---------|--------|---------------------|------------------|
| O       | K      | 78.87               | 9.77             |
| Cl      | K      | 5.84                | 1.57             |
| Bi      | L      | 15.19               | 2.56             |

### TRPL spectral data fitting

TRPL is fitted by a double exponential fitting curve:

$$f(x) = A_1 e^{-i/\tau_1} + A_2 e^{-i/\tau_2} + f(x_0)$$

The average carrier lifetime is calculated as follows:

$$\tau_{average} = \frac{A_1 \tau_1^2 + A_2 \tau_2^2}{A_1 \tau_1 + A_2 \tau_2}$$

**Table S4** Parameters fitted from TRPL spectra of BiOCl, BiOCl/Bi<sub>3</sub>O<sub>4</sub>Cl, and Bi<sub>3</sub>O<sub>4</sub>Cl nanosheetsb

| Sample                                      | A <sub>1</sub> | τ <sub>1</sub> | A <sub>2</sub> | τ <sub>2</sub> | τ <sub>average</sub> |
|---------------------------------------------|----------------|----------------|----------------|----------------|----------------------|
| BiOCl                                       | 89.48          | 0.38           | 10.52          | 3.94           | 0.76                 |
| BiOCl/Bi <sub>3</sub> O <sub>4</sub> C<br>1 | 79.18          | 0.39           | 20.80          | 4.30           | 1.18                 |
| Bi <sub>3</sub> O <sub>4</sub> Cl           | 91.00          | 0.37           | 9.00           | 4.18           | 0.71                 |

### Calculation of Apparent Quantum Yield (AQY)

The calculation formula for AQY is as follows:

$$AQY = \frac{N_e}{N_p} = \frac{10^9 (\nu \times N_A \times K) \times (h \times c)}{(I \times A \times \lambda)} \times 100\%$$

**Table S5** Apparent Quantum Yield at different wavelengths

| Wavelength | 400 nm | 420 nm | 450 nm | 475 nm | 520 nm |
|------------|--------|--------|--------|--------|--------|
| AQY(%)     | 0.176  | 0.117  | 0.052  | 0.023  | 0.029  |

**Table S6** Comparison of catalysts for photocatalytic nitrogen fixation

| Catalyst                                             | Reaction medium  | Scavenger | Light condition                        | Ammonia generation rate ( $\mu\text{mol/g/h}$ ) | reference |
|------------------------------------------------------|------------------|-----------|----------------------------------------|-------------------------------------------------|-----------|
| MoO <sub>2</sub> /BiOCl                              | H <sub>2</sub> O | No        | 500W Xe lamp, full range light         | 35                                              | 1         |
| Fe-BiOCl                                             | H <sub>2</sub> O | No        | 300W Xe lamp, $\lambda=200\sim 800$ nm | 30                                              | 2         |
| Ce-BiOCl                                             | H <sub>2</sub> O | No        | 200W Xe lamp, full range light         | 46.7                                            | 3         |
| r-PW12/BiOCl-OVs                                     | H <sub>2</sub> O | No        | 300W Xe lamp, full range light         | 33.53                                           | 4         |
| OVs-Bi <sub>12</sub> O <sub>17</sub> Cl <sub>2</sub> | H <sub>2</sub> O | No        | 500W Xe lamp, $\lambda=200\sim 800$ nm | 23.43                                           | 5         |
| BiOBr/BiOI/Bi                                        | H <sub>2</sub> O | No        | 300W Xe lamp, full range light         | 221.9                                           | 6         |
| BiOBr/Bi <sub>4</sub> O <sub>5</sub> Br <sub>2</sub> | H <sub>2</sub> O | No        | 300W Xe lamp, $\lambda > 420$ nm       | 66.87                                           | 7         |

|                                                                   |                  |         |                                       |        |              |
|-------------------------------------------------------------------|------------------|---------|---------------------------------------|--------|--------------|
| V <sub>0</sub> -BiOBr                                             | H <sub>2</sub> O | No      | 300 W Xe<br>lamp,<br>full range light | 54.70  | 8            |
| Bi/Bi <sub>2</sub> Sn <sub>2</sub> O <sub>7</sub>                 | H <sub>2</sub> O | No      | 300W Xe<br>lamp,                      | 284.5  | 9            |
| AgPt-TiO <sub>2</sub>                                             | H <sub>2</sub> O | No      | 300 W Xe<br>lamp, λ=350<br>nm         | 38.4   | 10           |
| La-MoO <sub>3-x</sub>                                             | H <sub>2</sub> O | No      | 300W Xe<br>lamp, λ>420<br>nm          | 209.0  | 11           |
| MoS <sub>2</sub> /In-Bi <sub>2</sub> MoO <sub>6</sub>             | H <sub>2</sub> O | No      | 300W Xe<br>lamp,<br>full range light  | 90     | 12           |
| Cu-Bi <sub>24</sub> O <sub>31</sub> Br <sub>10</sub>              | H <sub>2</sub> O | No      | 300W Xe<br>lamp,<br>full range light  | 291.1  | 13           |
| Cu-TiO <sub>2</sub>                                               | H <sub>2</sub> O | No      | 300W Xe<br>lamp,<br>full range light  | 78.9   | 14           |
| V <sub>0</sub> -Bi <sub>5</sub> O <sub>7</sub> I                  | H <sub>2</sub> O | Ethanol | 300W Xe<br>lamp, full<br>range light  | 162.48 | 15           |
| V <sub>0</sub> -SrBi <sub>4</sub> Ti <sub>4</sub> O <sub>15</sub> | H <sub>2</sub> O | No      | 300W Xe<br>lamp,<br>full range light  | 53.41  | 16           |
| BiOCl/Bi <sub>3</sub> O <sub>4</sub> Cl                           | H <sub>2</sub> O | No      | 300W Xe<br>lamp,<br>full range light  | 93.7   | This<br>work |

## References

- 1 C. Xiao, H. Wang, L. Zhang, S. Sun and W. Wang, Enhanced photocatalytic nitrogen fixation on MoO<sub>2</sub>/BiOCl composite, *ChemCatChem*, 2019, **11**, 6467-6472.
- 2 Z. Shen, F. Li, J. Lu, Z. Wang, R. Li, X. Zhang, C. Zhang, Y. Wang, Y. Wang, Z. Lv, J. Liu and C. Fan, Enhanced N<sub>2</sub> photofixation activity of flower-like BiOCl by in situ Fe(iii) doped as an activation center, *J. Colloid. Interface. Sci.*, 2021, **584**, 174-181.
- 3 H. Li, J. Wang, Z. Ruan, P. Nan, B. Ge, M. Cheng, L. Yang, X. Li, Q. Liu, B. Pan, Q. Zhang, C. Xiao and Y. Xie, Electron transfer bridge inducing polarization of nitrogen molecules for enhanced photocatalytic nitrogen fixation, *Mater. Horiz.*, 2023, **10**, 5053-5059.
- 4 M. Sun, R. Zhang, A. Sun, X. Jia, X. Liu, X. Yu and Y. Xing, Heteropoly blue-modified ultrathin bismuth oxychloride nanosheets with oxygen vacancies for efficient photocatalytic nitrogen fixation in pure water, *J. Colloid. Interface. Sci.*, 2025, **677**, 610-619.
- 5 S. H. W. Kok, J. Lee, W. Chong, B. Ng, X. Y. Kong, W. Ong, S. Chai and L. Tan, Bismuth-rich Bi<sub>12</sub>O<sub>17</sub>Cl<sub>2</sub> nanorods engineered with oxygen vacancy defects for enhanced photocatalytic nitrogen fixation, *J. Alloy. Compd.*, 2023, **952**, 170015.
- 6 K. Gao, H. Zhu, C. Zhang, X. Song, L. Lao, L. Ni, J. Chen, C. Cheng and X. Wang, Boosting photocatalytic nitrogen fixation via in situ constructing Bi metal active sites over BiOBr/BiOI heterojunction, *Sol. RRL*, 2022, **6**, 2200869.
- 7 H. Wang, Z. Chen, Y. Shang, C. Lv, X. Zhang, F. Li, Q. Huang, X. Liu, W. Liu, L. Zhao, L. Ye, H. Xie and X. Jin, Boosting carrier separation on a BiOBr/Bi<sub>4</sub>O<sub>5</sub>Br<sub>2</sub> direct Z-scheme heterojunction for superior photocatalytic nitrogen fixation, *ACS Catal.*, 2024, **14**, 5779-5787.
- 8 X. Xue, R. Chen, H. Chen, Y. Hu, Q. Ding, Z. Liu, L. Ma, G. Zhu, W. Zhang, Q. Yu, J. Liu, J. Ma and Z. Jin, Oxygen vacancy engineering promoted photocatalytic ammonia synthesis on ultrathin two-dimensional bismuth oxybromide nanosheets, *Nano Lett.*, 2018, **18**, 7372-7377.
- 9 R. Wu, S. Gao, C. Jones, M. Sun, M. Guo, R. Tai, S. Chen and Q. Wang, Bi/BSO heterojunctions via vacancy engineering for efficient photocatalytic nitrogen fixation, *Adv. Funct. Mater.*, 2024, **34**, 2314051.
- 10 X. Bian, Y. Zhao, S. Zhang, D. Li, R. Shi, C. Zhou, L. Wu and T. Zhang, Enhancing the supply of activated hydrogen to promote photocatalytic nitrogen fixation, *ACS Mater. Lett.*, 2021, **3**, 1521-1527.
- 11 X. Liu, Y. Luo, C. Ling, Y. Shi, G. Zhan, H. Li, H. Gu, K. Wei, F. Guo, Z. Ai and L. Zhang, Rare earth La single atoms supported MoO<sub>3-x</sub> for efficient photocatalytic nitrogen fixation, *Applied Catalysis B: Environmental*, 2022, **301**, 120766.
- 12 T. Ma, R. Li, Y. Huang, Y. Lu, L. Guo, M. Niu, X. Huang, R. A. Soomro, J. Ren, Q. Wang, B. Xu, C. Yang, F. Fu and D. Wang, Interfacial chemical-bonded MoS<sub>2</sub>/In-Bi<sub>2</sub>MoO<sub>6</sub> heterostructure for enhanced photocatalytic nitrogen-to-ammonia conversion, *ACS Catal.*, 2024, **14**, 6292-6304.
- 13 J. Di, C. Chen, Y. Wu, Y. Zhao, C. Zhu, Y. Zhang, C. Wang, H. Chen, J. Xiong, M. Xu, J. Xia, J. Zhou, Y. Weng, L. Song, S. Li, W. Jiang and Z. Liu, Polarized Cu-Bi site pairs for non-covalent to covalent interaction tuning toward N<sub>2</sub> photoreduction, *Adv. Mater.*, 2022, **34**, 2204959.
- 14 Y. Zhao, Y. Zhao, R. Shi, B. Wang, G. I. N. Waterhouse, L. Wu, C. Tung and T. Zhang, Tuning oxygen vacancies in ultrathin TiO<sub>2</sub> nanosheets to boost photocatalytic nitrogen fixation up to 700 nm, *Adv. Mater.*, 2019, **31**, 1806482.
- 15 M. Lan, N. Zheng, X. Dong, C. Hua, H. Ma and X. Zhang, Bismuth-rich bismuth oxyiodide microspheres with abundant oxygen vacancies as an efficient photocatalyst for nitrogen fixation, *Dalton Trans.*, 2020, **49**, 9123-9129.
- 16 S. Gao, H. Ji, P. Yang, M. Guo, J. Tressel, S. Chen and Q. Wang, High-performance photocatalytic reduction of nitrogen to ammonia driven by oxygen vacancy and ferroelectric polarization field of SrBi<sub>4</sub>Ti<sub>4</sub>O<sub>15</sub> nanosheets, *Small*, 2023, **19**, 2206114.
